# Supplementary material
Source: ML conference proceedings conference paper supplement (https://openreview.net/forum?id=gKui6QvvfK)

# Positional CLEVR - 2 Components

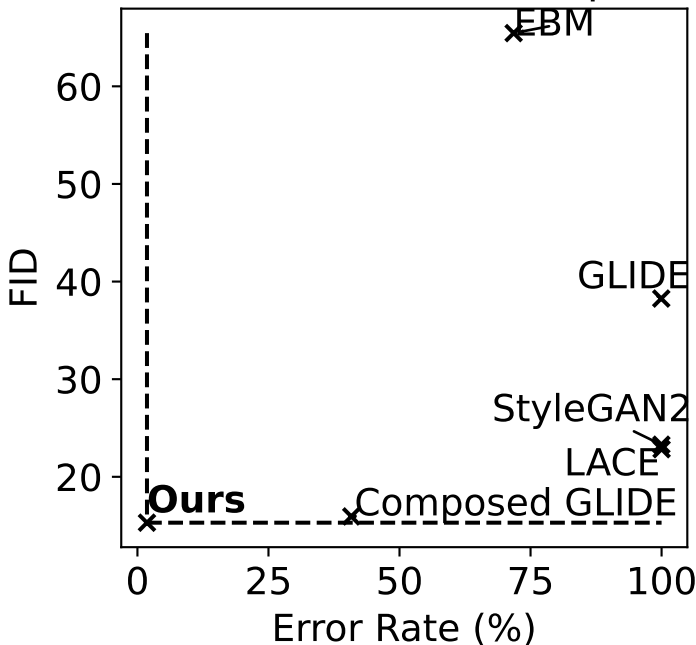

Supplement: supplementary_material [file attachment]

# Relational CLEVR - 3 Components

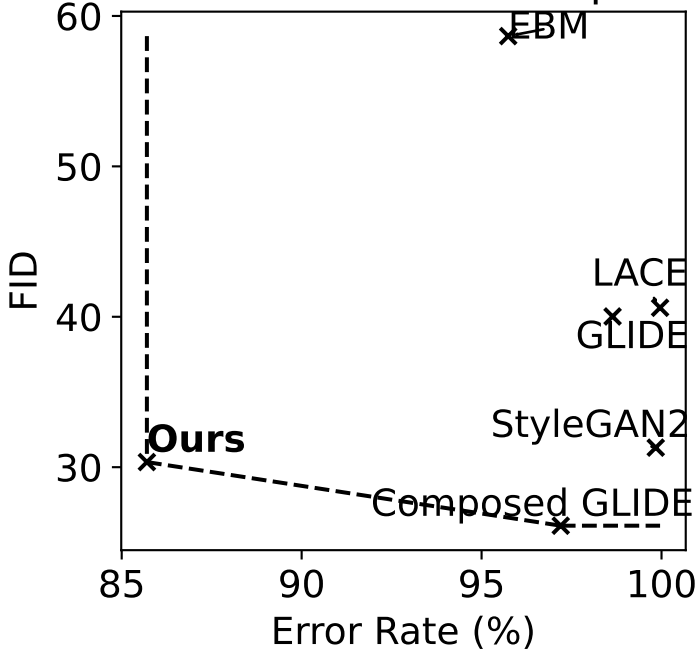

Supplement: supplementary_material [file attachment]

# FFHQ Attributes - 2 Components

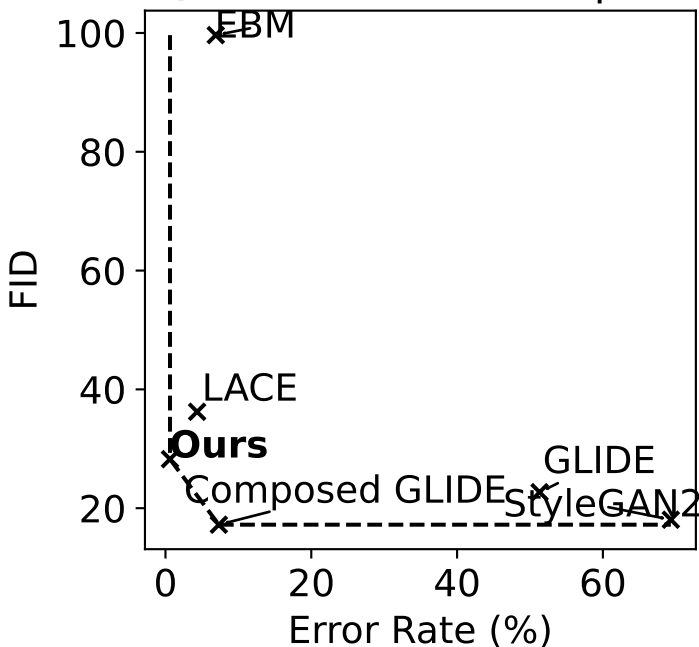

Supplement: supplementary_material [file attachment]

# Relational CLEVR - 2 Components

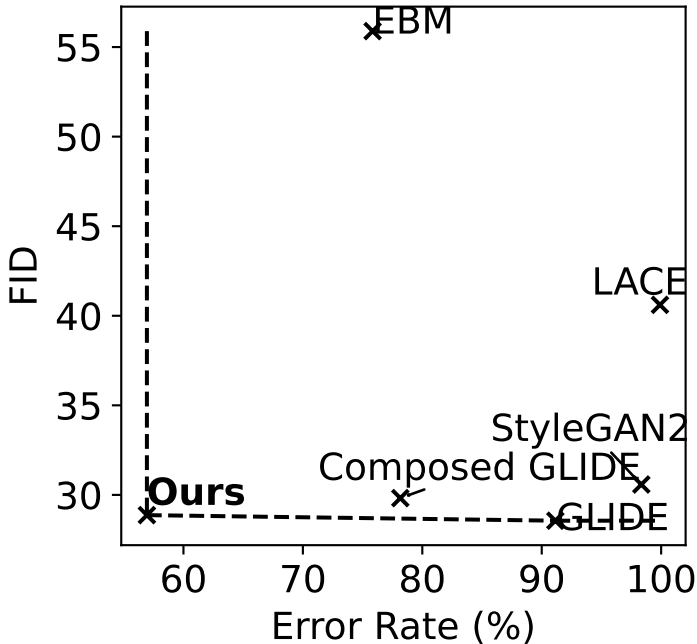

Supplement: supplementary_material [file attachment]

# FFHQ Attributes - 3 Components

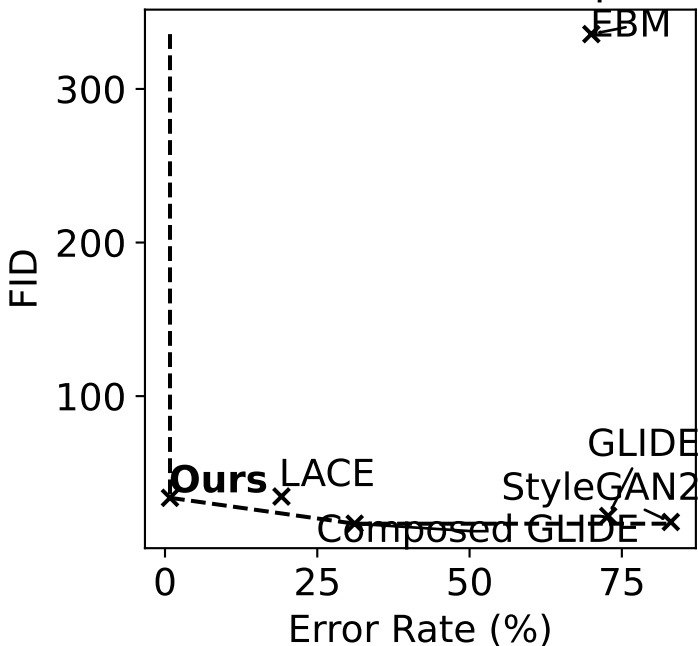

Supplement: supplementary_material [file attachment]

# Positional CLEVR - 1 Component

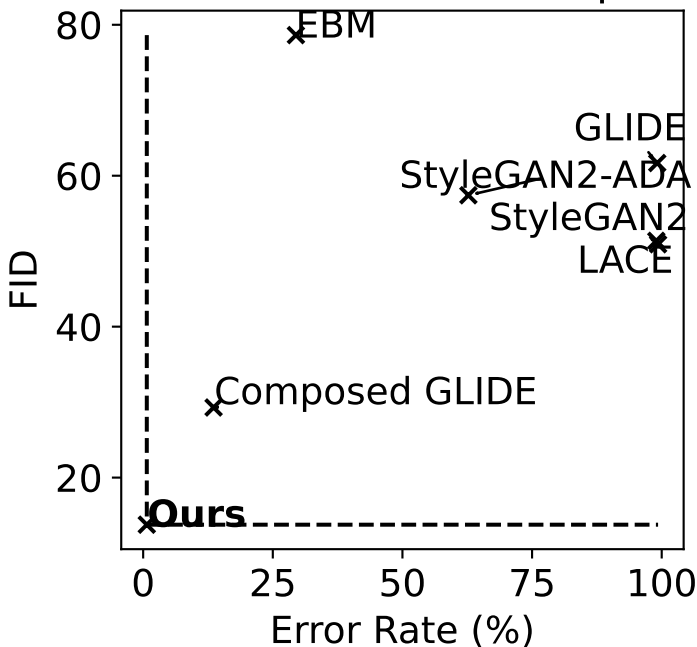

Supplement: supplementary_material [file attachment]

# Positional CLEVR - 3 Components

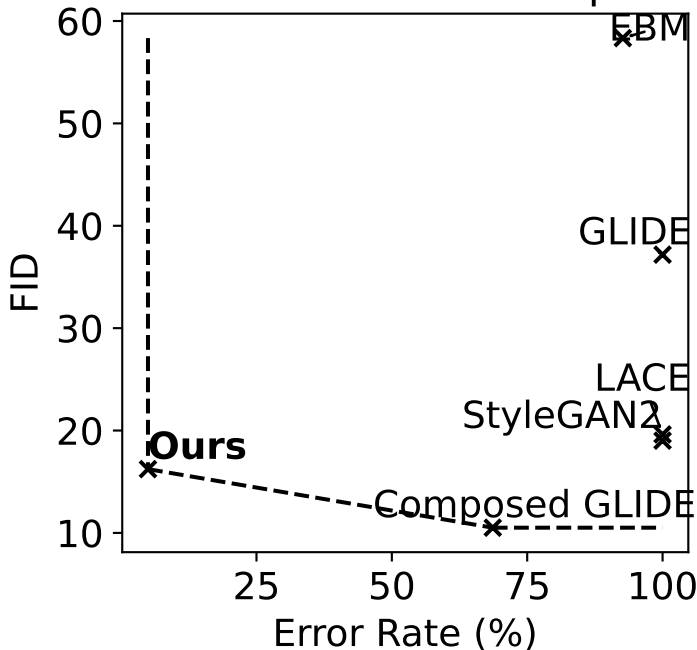

Supplement: supplementary_material [file attachment]

# FFHQ Attributes - 1 Component

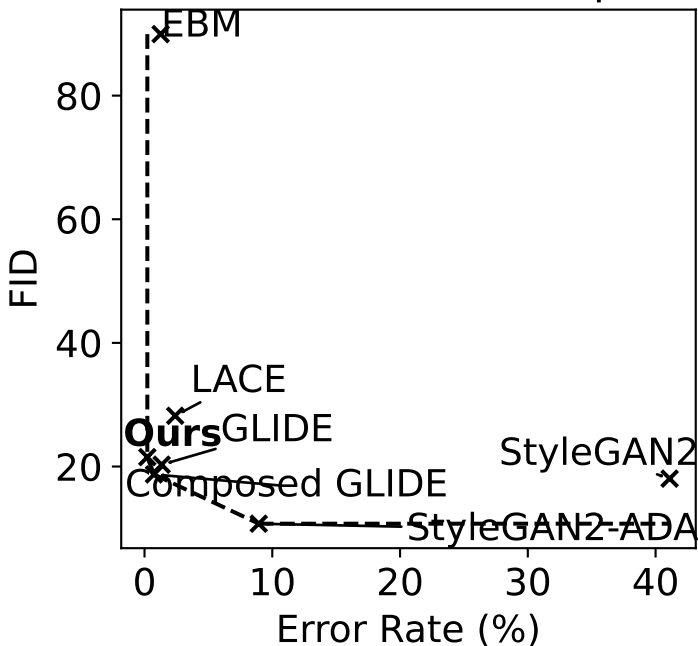

Supplement: supplementary_material [file attachment]

# Relational CLEVR - 1 Component

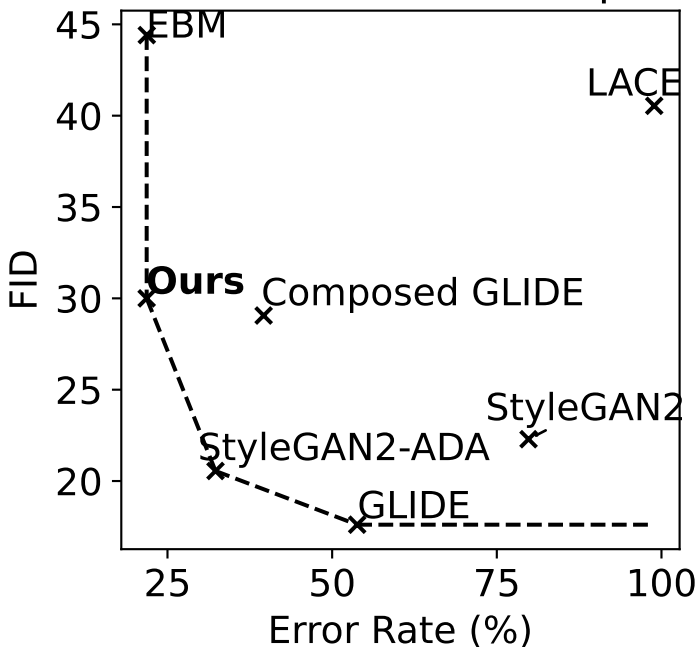

Supplement: supplementary_material [file attachment]
